# Supplementary material for: Biologically-derived nanoparticles for chemo-ferroptosis combination therapy
Source: Royal Society of Chemistry journal article supplement (doi:10.1039/d1qm00295c), 2021-01-01
Supplement: d1qm00295c1.pdf [file d1qm00295c1.pdf]

# Biologically-derived nanoparticles for chemo-ferroptosis combination therapy

Haifeng Sun,<sup>a</sup> Zhonghe Zhang,<sup>a</sup> Xiaoyu Kang,<sup>a</sup> Qiong Dai,<sup>a</sup> Aixin Song,<sup>a</sup> Jingcheng Hao<sup>a</sup> and Jiwei Cui<sup>\*ab</sup>

<sup>a</sup>Key Laboratory of Colloid and Interface Chemistry of the Ministry of Education, School of Chemistry and Chemical Engineering, Shandong University, Jinan, Shandong 250100, China

<sup>b</sup>State Key Laboratory of Microbial Technology, Shandong University, Qingdao, Shandong 266237, China

Email: [jwcui@sdu.edu.cn](mailto:jwcui@sdu.edu.cn)

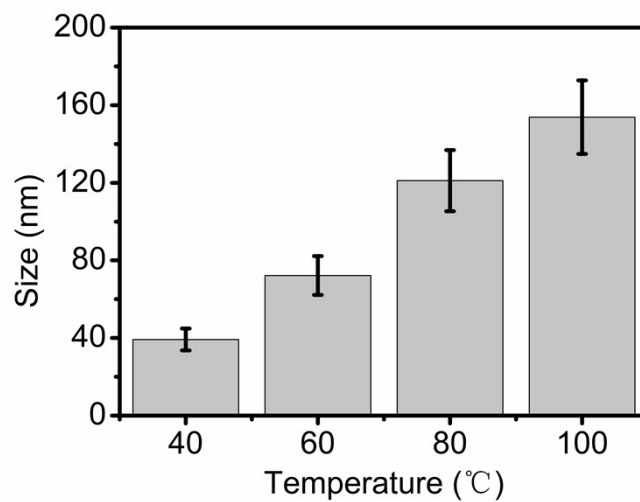

**Fig. S1** The influence of heating temperature on the size changes of MBNs.

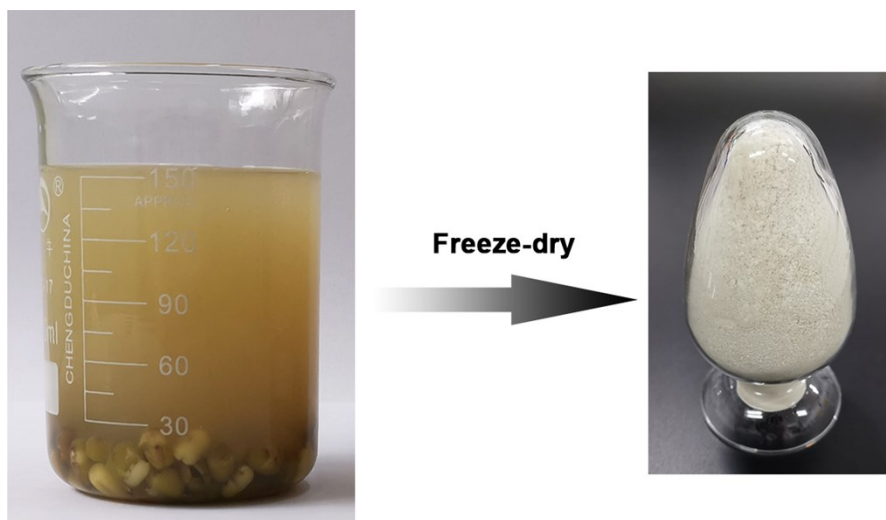

**Fig. S2** Photographs of MBN suspensions and freeze-dried MBNs obtained from 150 g of MBs.

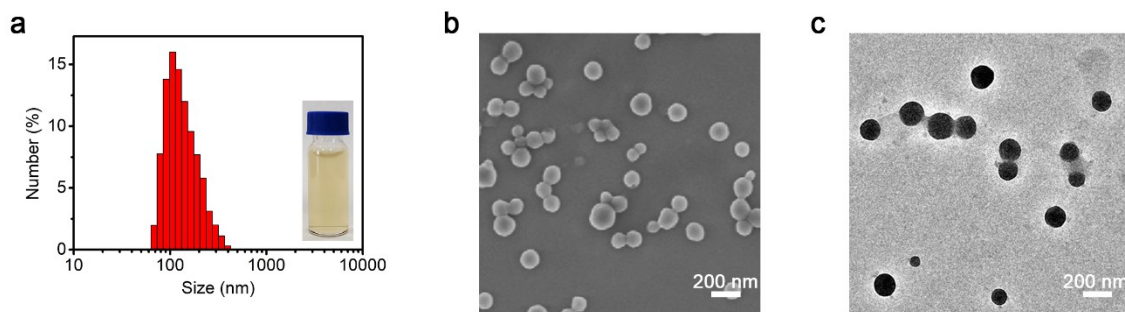

**Fig. S3** (a) Size distribution, (b) SEM and (c) TEM images of redispersed MBNs. The inset in (a) is the photograph of the MBN dispersion.

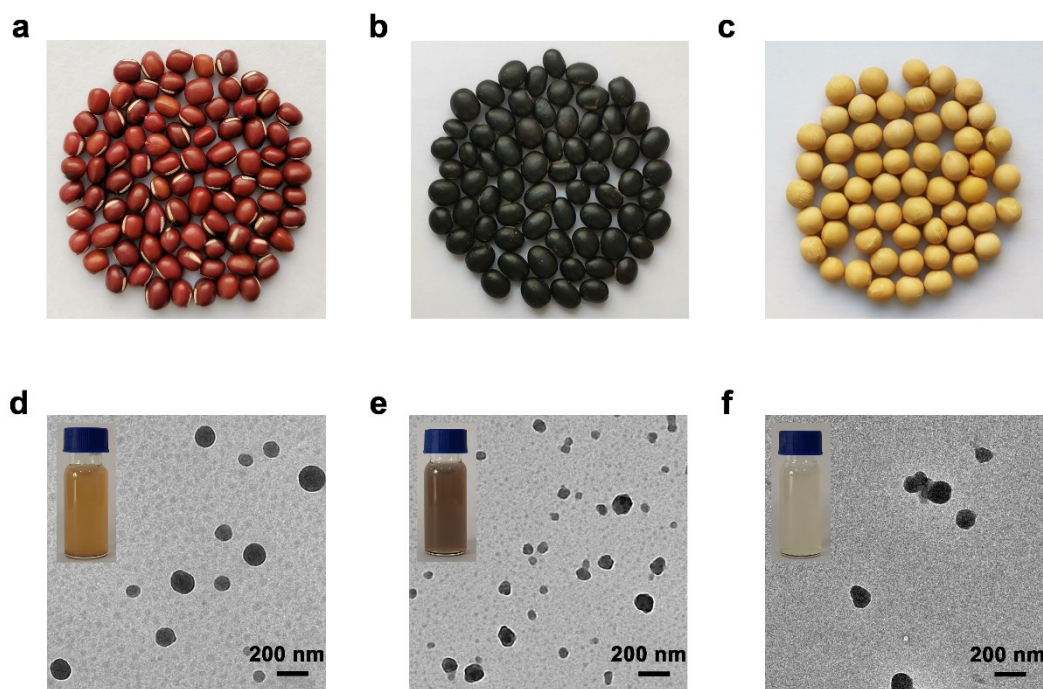

**Fig. S4** Photographs of (a) ormosia, (b) black beans, and (c) soybeans as well as the corresponding TEM images (d-f) of the biologically-derived NPs. The insets in (d-f) are the photographs of the NP dispersions.

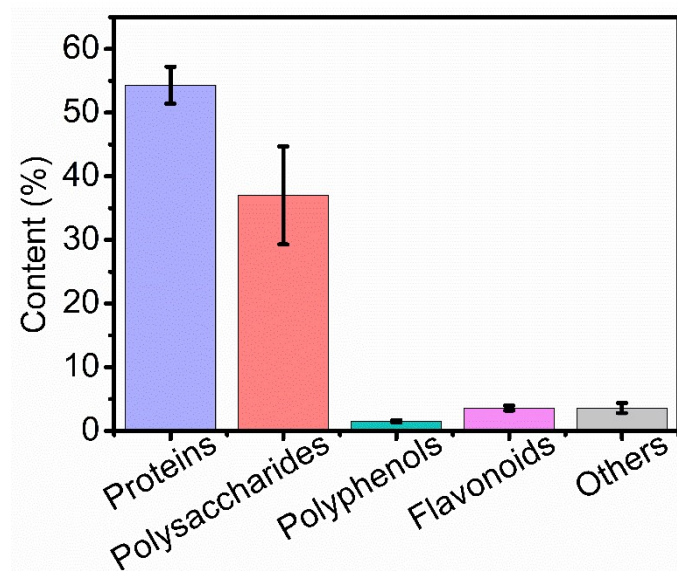

**Fig. S5** Proportions of proteins, polysaccharides, polyphenols, and flavonoids in MBNs.

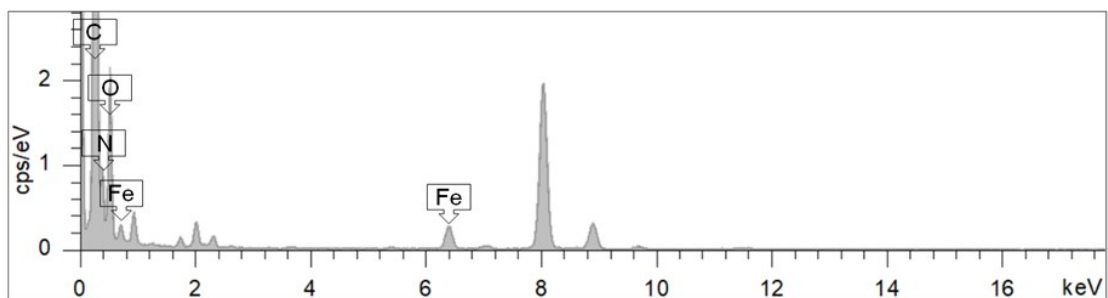

**Fig. S6** EDS analysis of DOX&Fe@MBNs indicating the existence of Fe in NPs.

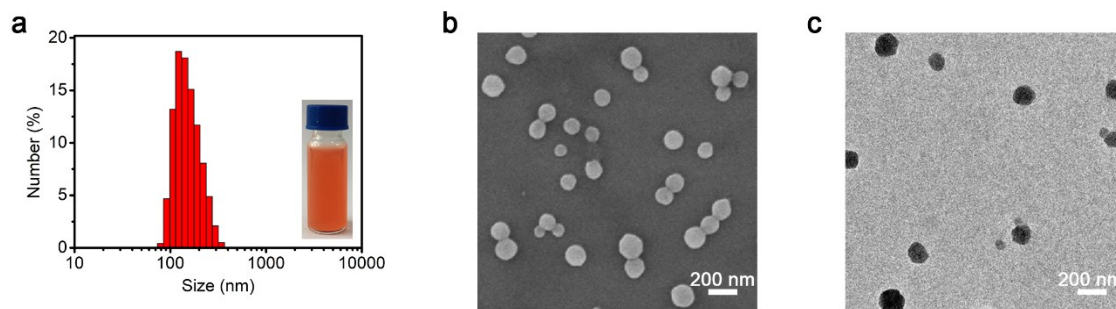

**Fig. S7** (a) Size distribution, (b) SEM and (c) TEM images of DOX@MBNs. The inset in (a) is the photograph of the DOX@MBN dispersion.



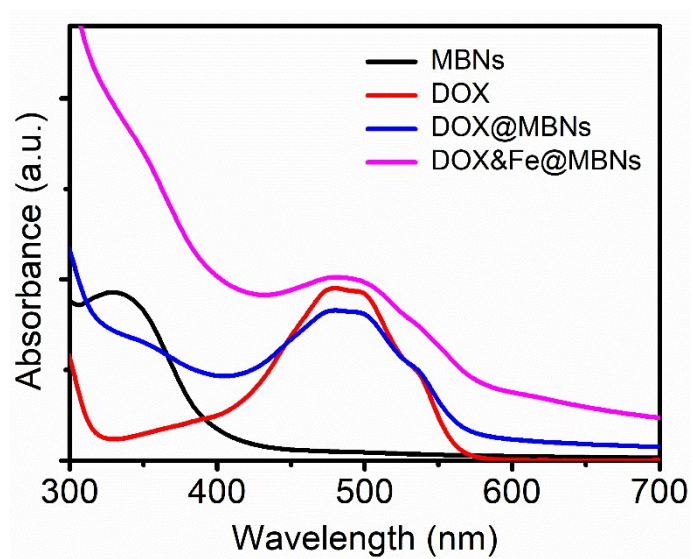

**Fig. S8** UV-vis absorption spectra of MBNs, DOX, DOX@MBNs, and DOX&Fe@MBNs in water.

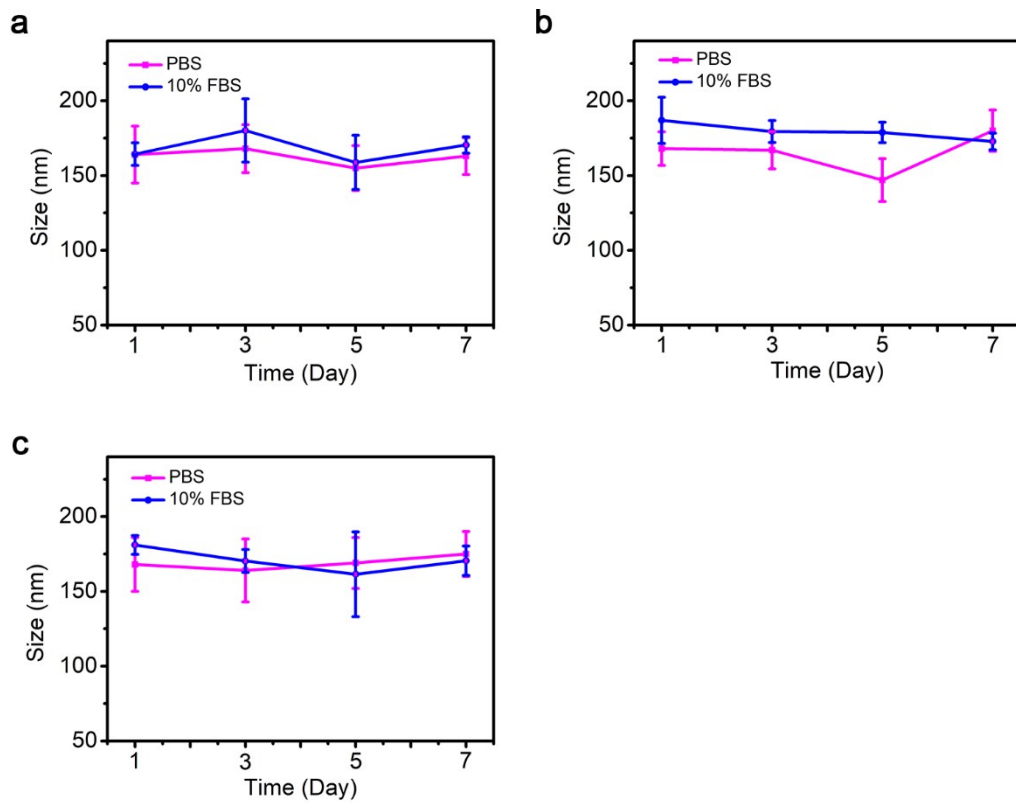

**Fig. S9** NP size variations of (a) MBNs, (b) DOX@MBNs and (c) DOX&Fe@MBNs in PBS buffer (pH 7.4) and 10% FBS.

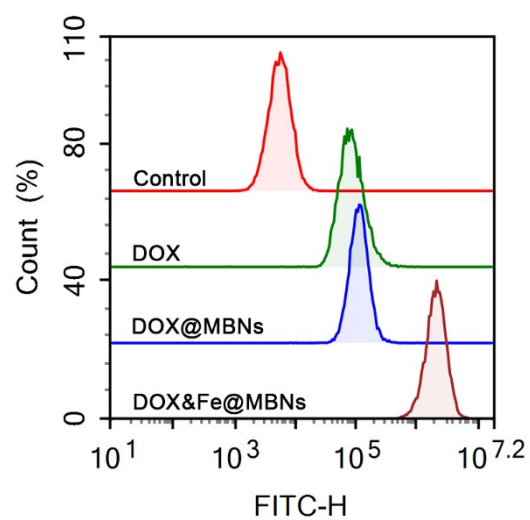

**Fig. S10** Flow cytometry analysis of ROS generation after incubation with PBS (control), DOX, DOX@MBNs, and DOX&Fe@MBNs.

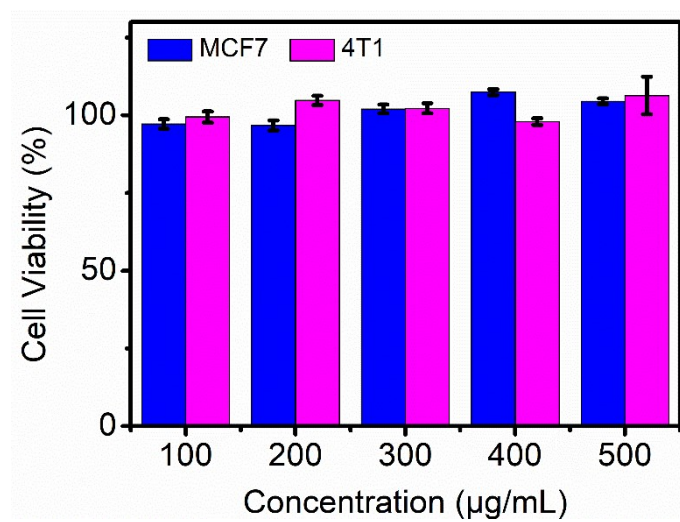

**Fig. S11** Viability of MCF7 and 4T1 cells after incubation with MBNs for 24 h.

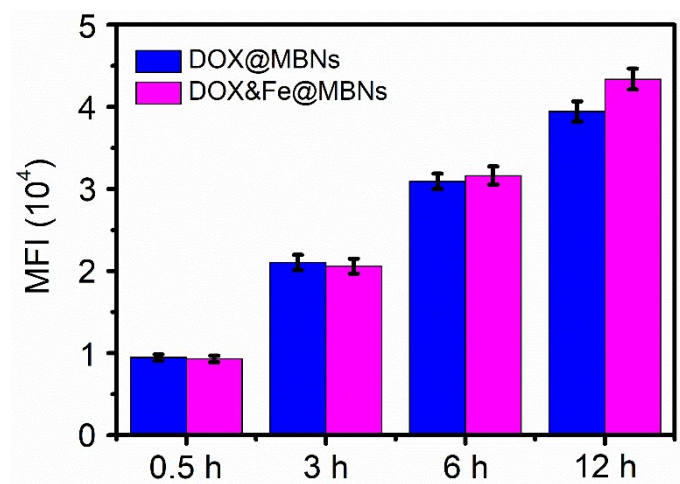

**Fig. S12** MFI of MCF7 cells after incubation with DOX@MBNs and DOX&Fe@MBNs.

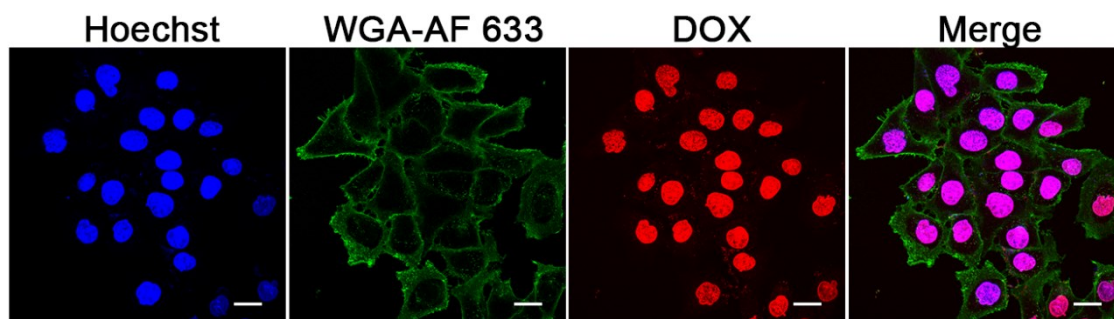

**Fig. S13** CLSM images of MCF7 cells after incubation with DOX@MBNs for 12 h. Nuclei and cytomembrane were stained with Hoechst 33342 and WGA-AF633 (green pseudo color), respectively. Scale bars are 25 μm.

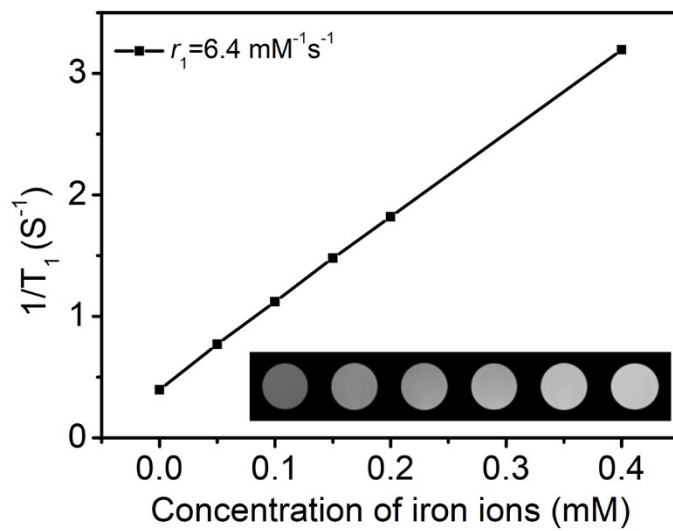

**Fig. S14**  $T_1$  relaxation rate of DOX&Fe@MBNs. The inset is the  $T_1$ -weighted MR images of DOX&Fe@MBNs with different concentration of iron ions.

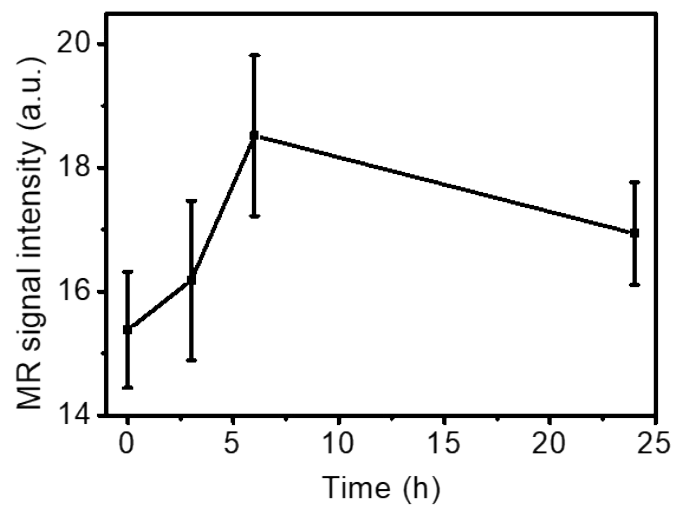

**Fig. S15** Variation of MR signal intensity at the tumor site at different time points.



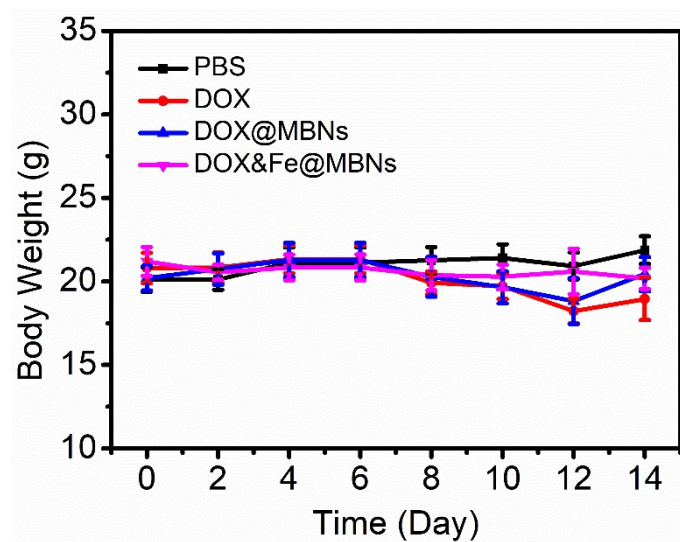

**Fig. S16** Body weight changes of the tumor-bearing mice during the treatment.

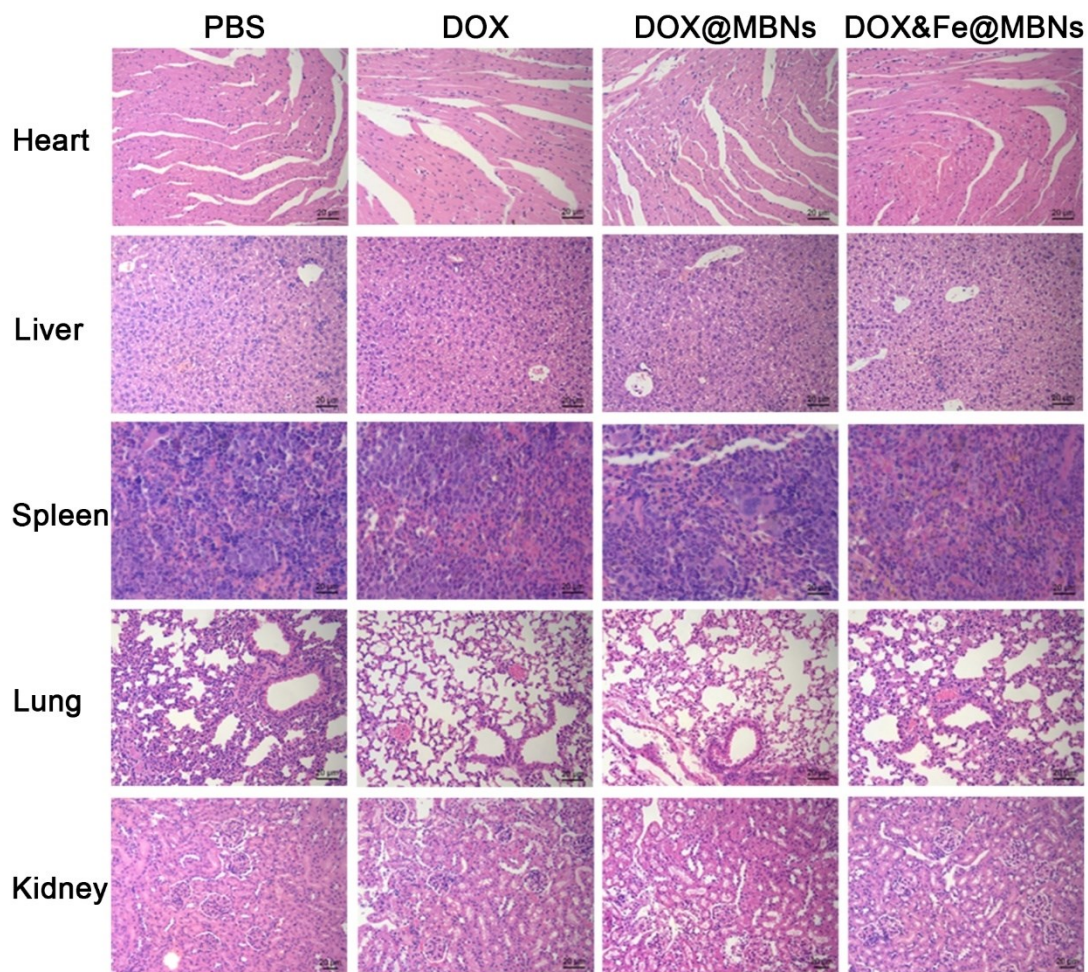

**Fig. S17** H&E staining of the major organs (i.e., heart, liver, spleen, lung, and kidney) after different treatments for 14 days.
